# Supplementary material for: Synergistic reaction between SO2 and NO2 on mineraloxides: a potential formation pathway of sulfate aerosol
Source: Royal Society of Chemistry journal article supplement (doi:10.1039/c1cp22217a), 2011-10-13
Supplement: c1cp22217a.pdf [file c1cp22217a.pdf]

# Supplementary Information

for

## Synergistic reaction between SO<sub>2</sub> and NO<sub>2</sub> on mineral oxides: a potential formation pathway of sulfate aerosol

Chang Liu, Qingxin Ma, Yongchun Liu, Jinzhu Ma, Hong He\*

*\*Research Center for Eco-Environmental Science, Chinese Academy of Sciences,  
Beijing 100085, China*

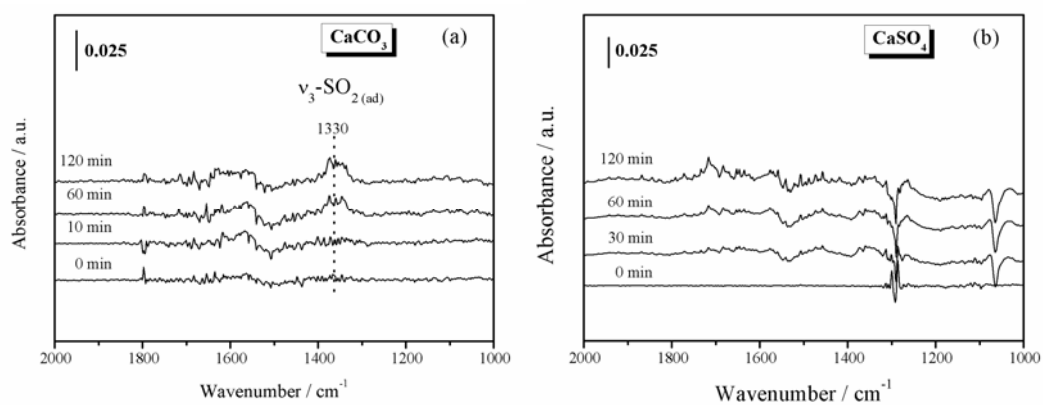

Figure S1. *In situ* DRIFTS spectra for the reaction of 200 ppmv SO<sub>2</sub> and 200 ppmv NO<sub>2</sub> on (a) CaCO<sub>3</sub> and (b) CaSO<sub>4</sub> as a function of time in a flow of 100 mL min<sup>-1</sup> synthetic air (20% O<sub>2</sub>, 80% N<sub>2</sub>) at 303 K.

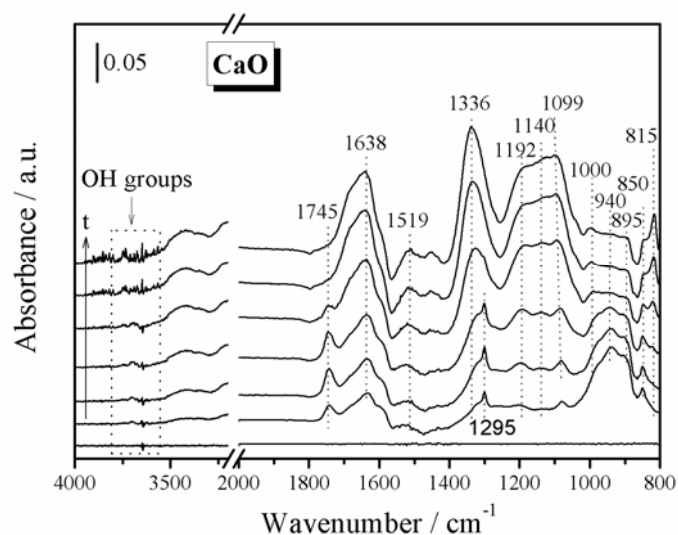

Figure S2. Dynamic changes in the *in situ* DRIFTS spectra of CaO sample as a function of time in a flow of 200 ppmv  $\text{SO}_2$  + 200 ppmv  $\text{NO}_2$  + 20%  $\text{O}_2$  + 80%  $\text{N}_2$  at 303 K. Total flow rate was  $100 \text{ mL min}^{-1}$ .

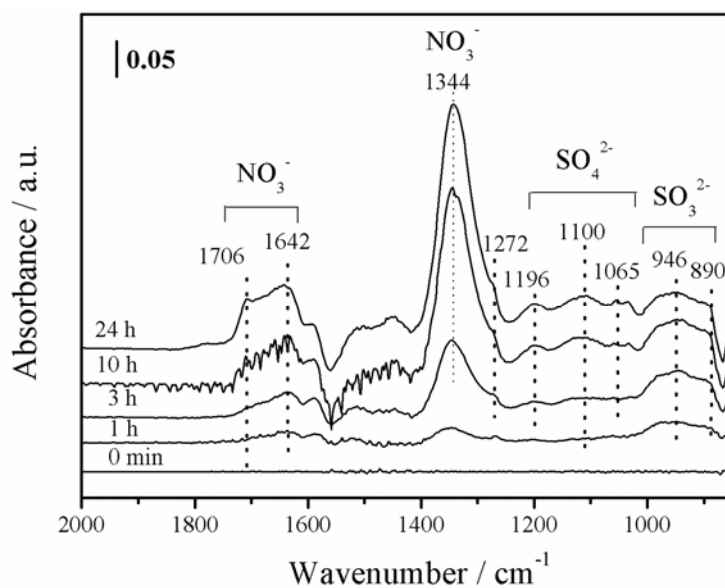

Figure S3. *In situ* DRIFTS spectra of 500 ppbv  $\text{SO}_2$  and 500 ppbv  $\text{NO}_2$  reaction in a flow of  $100 \text{ mL min}^{-1}$  synthetic air (20%  $\text{O}_2$ , 80%  $\text{N}_2$ ) on the surface of CaO as a function of time at 303 K.
